# Supplementary material for: Core@shell structured Co–CoO@NC nanoparticles supported on nitrogen doped carbon with high catalytic activity for oxygen reduction reaction
Source: Royal Society of Chemistry journal article supplement (doi:10.1039/c8ra01680a), 2018-01-01
Supplement: c8ra01680a1.pdf [file c8ra01680a1.pdf]

## Supplementary Information

### Core@Shell Structured Co-CoO@NC Nanoparticles Supported on Nitrogen Doped Carbon with High Catalytic Activity for Oxygen Reduction Reaction

Zihao Zhen,<sup>a</sup> Zhongqing Jiang,<sup>b,c</sup> Xiaoning Tian,<sup>c</sup> Lingshan Zhou,<sup>a</sup> Binglu Deng,<sup>a</sup> Bohong Chen<sup>a</sup> and Zhong-Jie Jiang <sup>\*a</sup>

<sup>a</sup>. Guangzhou Key Laboratory for Surface Chemistry of Energy Materials, New Energy Research Institute, College of Environment and Energy, South China University of Technology, Guangzhou 510006, Guangdong, P. R. China. E-mail: Zhongjiejiang1978@hotmail.com or eszjiang@scut.edu.cn.

<sup>b</sup>. Department of Physics, Key Laboratory of ATMMT Ministry of Education, Zhejiang Sci-Tech University, Hangzhou 310018, P. R. China.

<sup>c</sup>. School of Materials and Chemical Engineering, Ningbo University of Technology, Ningbo 315211, Zhejiang, P. R. China.

## Content

|                                 |   |
|---------------------------------|---|
| 1. Element mapping .....        | 3 |
| 2. TGA curve .....              | 3 |
| 3. TEM images.....              | 4 |
| 4. XPS survey spectra .....     | 5 |
| 5. XRD patterns.....            | 5 |
| 6. Raman spectra.....           | 6 |
| 7. LSVs and K-L plots .....     | 6 |
| 8. Elemental composition.....   | 7 |
| 9. Performance comparison ..... | 8 |
| References .....                | 8 |

## 1. Element mapping

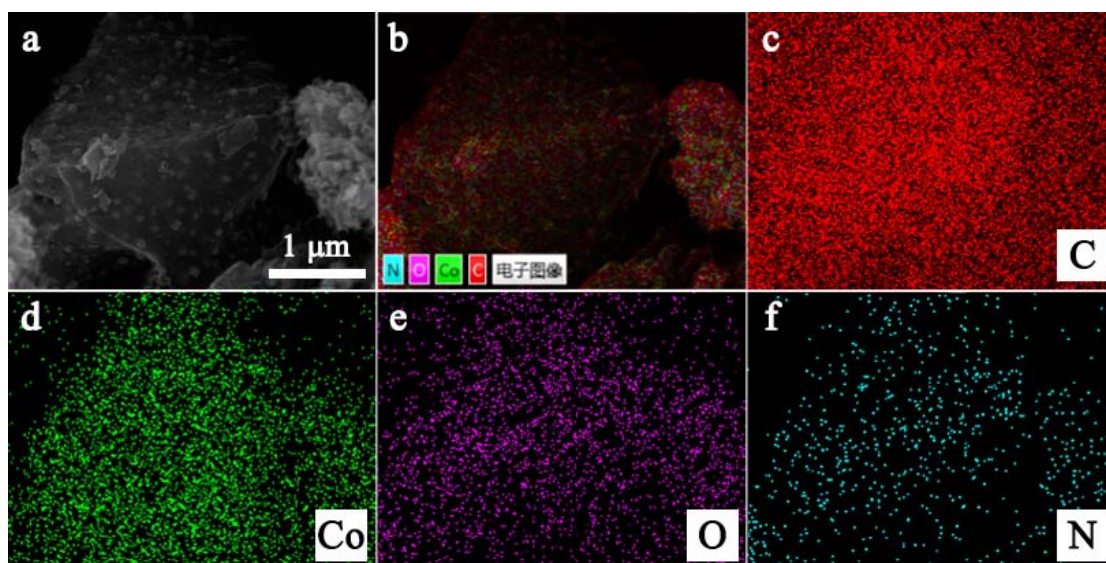

**Figure S1.** The SEM image and corresponding elemental mapping images of Co-CoO@NC/NC-800.

## 2. TGA curve

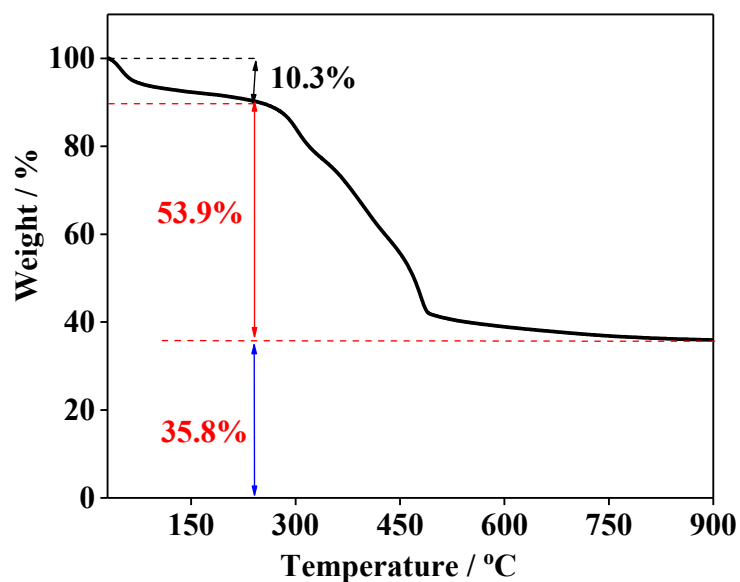

**Figure S2.** TGA curve of the Co-CoO@NC/NC-800.

The weight loss below 200 °C could be attributed to the vaporization of physically adsorbed water, which accounts for 10.3 wt.% of the Co-CoO@NC/NC-800. The weight loss

at the temperature higher than 200°C could be attributed to the decomposition of the Co-CoO@NC/NC-800 with association of the transformation of Co and CoO to Co<sub>3</sub>O<sub>4</sub>. Assuming that the atomic ratio of Co<sup>(0)</sup>: Co<sup>(II)</sup>=3:2 (estimated from the XPS result), the weight percentage of Co-CoO in the Co-CoO@NC/NC-800 could be calculated as follows:

$$wt. \% \text{ of } Co - CoO = 35.8\% / \left( 0.6 \times \frac{MW_{Co_3O_4}}{MW_{CoO}} + 0.4 \times \frac{MW_{Co_3O_4}}{MW_{CoO}} \right) = 28.7\%$$

### 3. TEM images

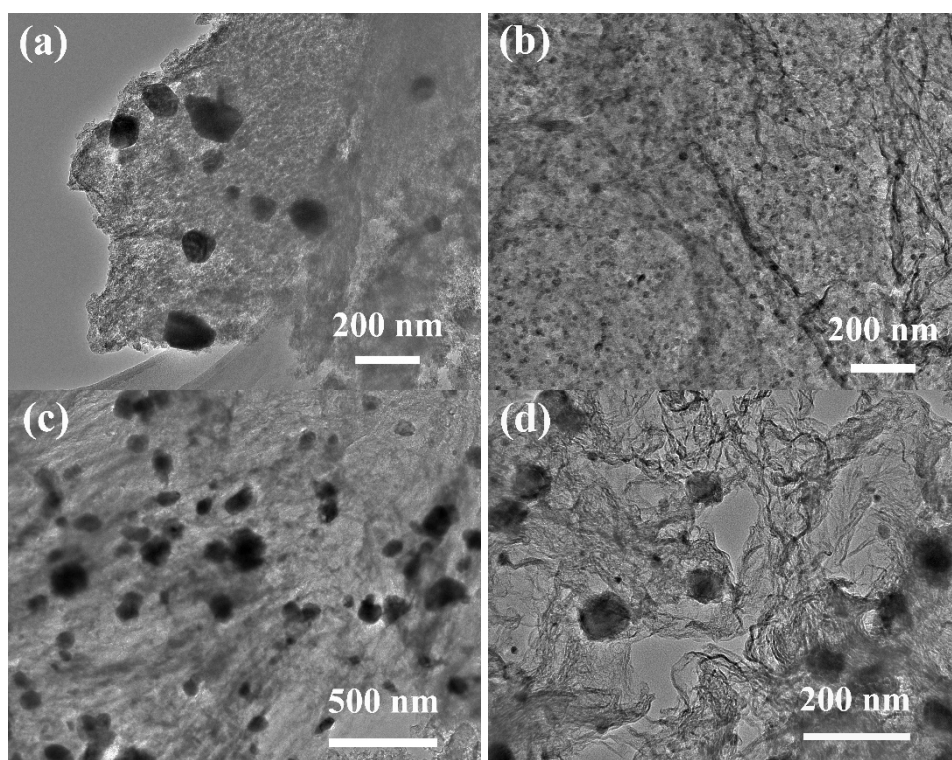

**Figure S3.** TEM images of (a) the Co-CoO@C/C-800, (b) the Co-CoO@NC/NC-700, (c) the Co-CoO@NC/NC-900, (d) the Co-CoO@NC/NC-800 synthesized without the drying at 200°C.

#### 4. XPS survey spectra

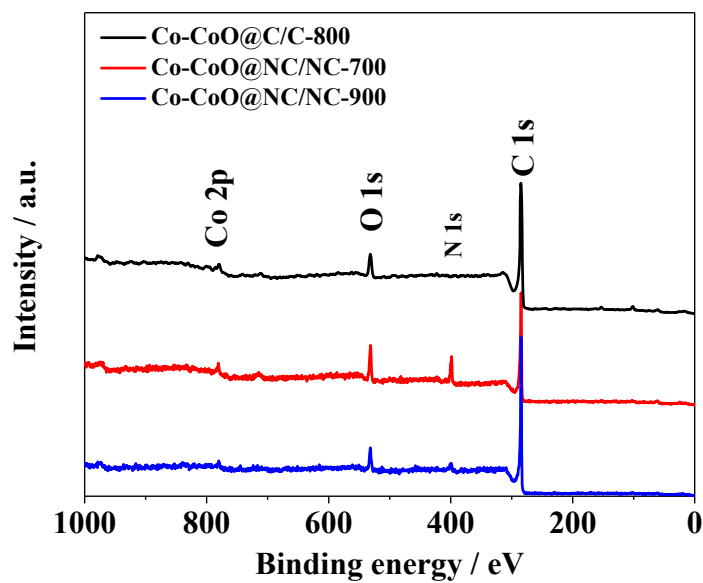

**Figure S4.** XPS survey spectra of the Co-CoO@C/C-800, the Co-CoO@NC/NC-700, the Co-CoO@NC/NC-900.

#### 5. XRD patterns

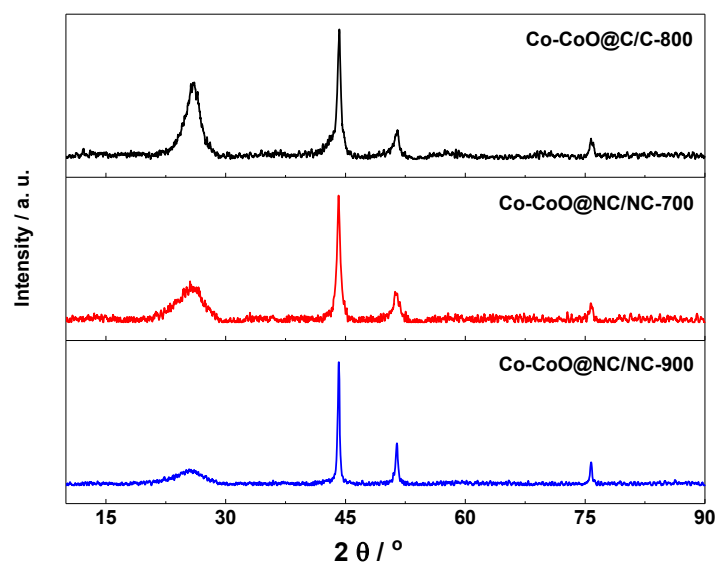

**Figure S5.** XRD patterns of the Co-CoO@C/C-800, the Co-CoO@NC/NC-700, the Co-CoO@NC/NC-900.

## 6. Raman spectra

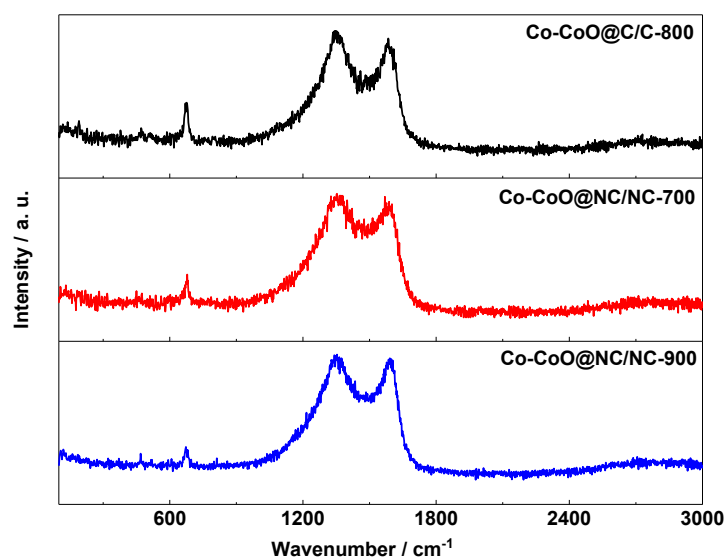

**Figure S6.** Raman spectra of the Co-CoO@C/C-800, the Co-CoO@NC/NC-700, the Co-CoO@NC/NC-900.

## 7. LSVs and K-L plots

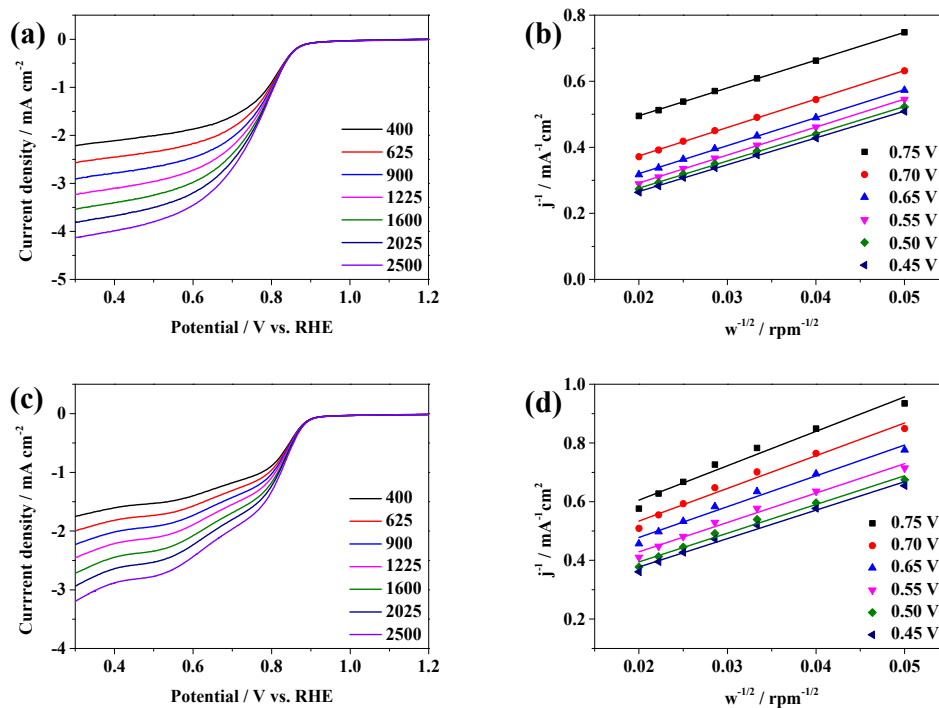

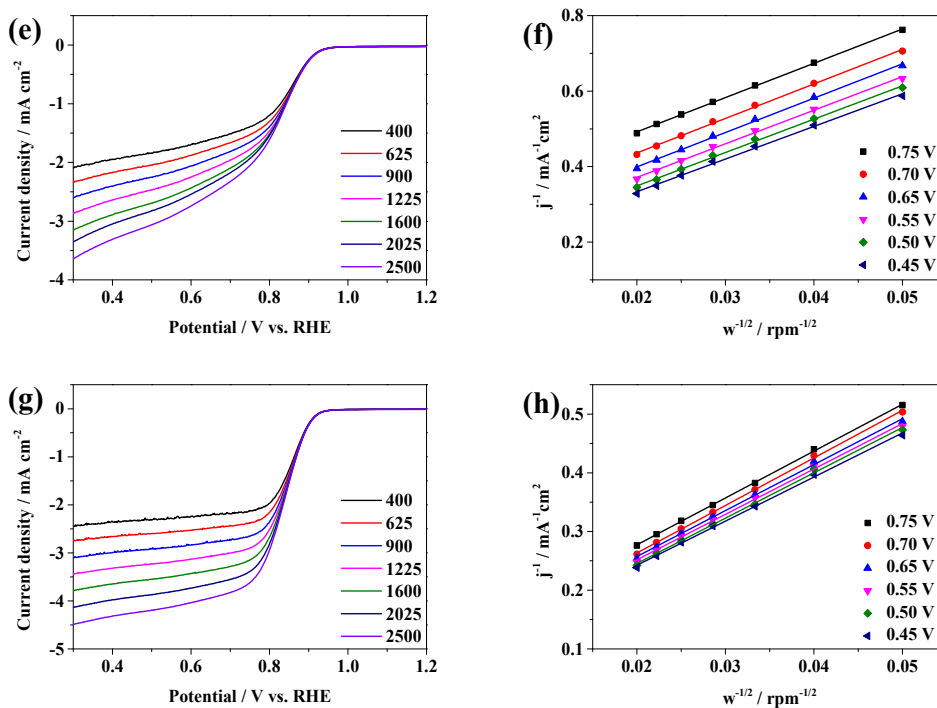

**Figure S7.** LSVs and K-L plots for the ORR by (a, b) the NC, (c, d) the Co-CoO@C/C-800, (e, f) the Co-CoO@NC/NC-700, (g, h) the Co-CoO@NC/NC-900 in an O<sub>2</sub>-saturated 0.1 M KOH solution at various rotation rates at a scan rate of 5 mV/s.

## 8. Elemental composition

**Table S1.** Relative atomic percentages of the elements in the Co-CoO@NC/NC-800, the NC, the Co-CoO@C/C-800, the Co-CoO@NC/NC-700, and the Co-CoO@NC/NC-900.

| Samples          | Co   | C     | N     | O     |
|------------------|------|-------|-------|-------|
| Co-CoO@NC/NC-800 | 1.7  | 82.6  | 10.2  | 5.5   |
| NC               | 0    | 82.4  | 11.9  | 5.7   |
| Co-CoO@C/C-800   | 1.1  | 87.6  | 3.8   | 7.5   |
| Co-CoO@NC/NC-700 | 3.32 | 71.52 | 13.75 | 11.41 |
| Co-CoO@NC/NC-900 | 2.12 | 85.02 | 5.63  | 7.24  |

## 9. Performance comparison

**Table S2.** Comparison of the ORR onset potential of the Co-CoO@NC/NC-800 with those of the catalysts reported.

| Catalyst                                   | Mass Loading / mg cm <sup>-2</sup> | Onset potential / V vs. RHE <sup>a</sup> | Half-wave potential / V vs. RHE | Reference |
|--------------------------------------------|------------------------------------|------------------------------------------|---------------------------------|-----------|
| Co-CoO@NC/NC-800                           | 0.102                              | 0.961                                    | 0.868                           | This work |
| N-C@Co-2                                   | 0.213                              | 0.895                                    |                                 | 1         |
| Co-N-GN                                    | 0.1                                | 0.864                                    | 0.800                           | 2         |
| g-VB12                                     | 0.6                                | 0.925                                    | 0.833                           | 3         |
| Co/NrGO                                    | 0.2                                | 0.902                                    |                                 | 4         |
| Co-NCA5                                    | 0.2                                | 0.842                                    | 0.802                           | 5         |
| Co-N-GC-800                                | 0.2                                | 0.900                                    | 0.810                           | 6         |
| Co-NMCV                                    | 0.153                              | 0.832                                    | 0.783                           | 7         |
| Co-C@NWCs                                  | 0.1                                | 0.939                                    | 0.83                            | 8         |
| Co <sub>3</sub> O <sub>4</sub> -SP/NGr-24h | 1                                  | 0.896                                    | 0.756                           | 9         |
| Co/N-C-800                                 | 0.25                               | 0.834                                    |                                 | 10        |
| CNCNT                                      | 0.1                                | 0.900                                    |                                 | 11        |
| Co@CoO@N-C/C                               | 0.42                               | 0.92                                     | 0.81                            | 12        |
| Co/CoO@Co-N-C-800                          | 0.2                                | 0.913                                    | 0.793                           | 13        |
| MOFs-800                                   | 0.335                              | 0.90                                     | 0.80                            | 14        |
| Fe <sub>3</sub> C@NG800                    | 0.2                                | 0.98                                     | 0.87                            | 15        |
| G-Co/CoO                                   | 0.1                                | 0.882                                    | 0.786                           | 16        |
| NCA_CZ_FeCo                                | 0.21                               | 0.95                                     | 0.888                           | 17        |
| N-CoO                                      | 0.07                               | 0.773                                    | 0.653                           | 18        |
| HP-Co-NCNFs                                | 0.306                              | 0.907                                    |                                 | 19        |
| CoFe <sub>2</sub> O <sub>4</sub> /NG       | 0.283                              | 0.932                                    | 0.818                           | 20        |
| Co(OH) <sub>x</sub> -NCNT                  | 0.1                                | 0.87                                     |                                 | 21        |
| Co <sub>0.5</sub> Fe <sub>0.5</sub> S@N-MC | 0.8                                | 0.913                                    | 0.808                           | 22        |
| CoO/NCW                                    | 0.244                              | 0.85                                     | 0.78                            | 23        |
| BNC/Co <sub>2</sub> P-2                    | 0.213                              | 0.893                                    | 0.813                           | 24        |
| CoO/MC-1.5                                 | 0.510                              | 0.882                                    |                                 | 25        |
| Co-S/G-3                                   | 0.08                               | 0.89                                     | 0.82                            | 26        |

<sup>a</sup> The ORR onset potential is defined at which the current density reaches to 0.1 mA cm<sup>-2</sup>.

## References

1. C. Han, X. Bo, Y. Zhang, M. Li, A. Nsabimana and L. Guo, *Nanoscale*, 2015, **7**, 5607-5611.
2. S. Jiang, C. Zhu and S. Dong, *J. Mater. Chem. A*, 2013, **1**, 3593-3599.



3. Y. Jiang, Y. Lu, X. Wang, Y. Bao, W. Chen and L. Niu, *Nanoscale*, 2014, **6**, 15066-15072.
4. T. Kottakkat and M. Bron, *ChemElectroChem*, 2014, **1**, 2163-2171.
5. K. Kreek, A. Sarapuu, L. Samolberg, U. Joost, V. Mikli, M. Koel and K. Tammeveski, *ChemElectroChem*, 2015, **2**, 2079-2088.
6. C. Li, Z. Han, Y. Yu, Y. Zhang, B. Dong, A. Kong and Y. Shan, *RSC Adv.*, 2016, **6**, 15167-15174.
7. M. Li, X. Bo, Y. Zhang, C. Han, A. Nsabimana and L. Guo, *J. Mater. Chem. A*, 2014, **2**, 11672-11682.
8. Y. Li, F. Cheng, J. Zhang, Z. Chen, Q. Xu and S. Guo, *Small*, 2016, **12**, 2839-2845.
9. S. K. Singh, V. M. Dhavale and S. Kurungot, *ACS Appl. Mater. Interfaces*, 2015, **7**, 21138-21149.
10. J. Masa, W. Xia, I. Sinev, A. Zhao, Z. Sun, S. Grutzke, P. Weide, M. Muhler and W. Schuhmann, *Angew. Chem. Int. Ed.*, 2014, **53**, 8508-8512.
11. Z. Wang, S. Xiao, Z. Zhu, X. Long, X. Zheng, X. Lu and S. Yang, *ACS Appl. Mater. Interfaces*, 2015, **7**, 4048-4055.
12. Z. Wu, J. Wang, L. Han, R. Lin, H. Liu, H. L. Xin and D. Wang, *Nanoscale*, 2016, **8**, 4681-4687.
13. X. Zhang, R. Liu, Y. Zang, G. Liu, G. Wang, Y. Zhang, H. Zhang and H. Zhao, *Chem. Commun.*, 2016, **52**, 5946-5949.
14. H. Zhong, Y. Luo, S. He, P. Tang, D. Li, N. Alonso-Vante and Y. Feng, *ACS Appl. Mater. Interfaces*, 2017, **9**, 2541-2549.
15. H. Jiang, Y. Yao, Y. Zhu, Y. Liu, Y. Su, X. Yang and C. Li, *ACS Appl. Mater. Interfaces*, 2015, **7**, 21511-21520.
16. S. Guo, S. Zhang, L. Wu and S. Sun, *Angew. Chem. Int. Ed.*, 2012, **51**, 11770-11773.
17. K. Elumeeva, J. Ren, M. Antonietti and T.-P. Fellingner, *ChemElectroChem*, 2015, **2**, 584-591.

18. H. Yu, Y. Li, X. Li, L. Fan and S. Yang, *Chem. Eur. J.*, 2014, **20**, 3457-3462.
19. S. Wang, Z. Cui and M. Cao, *Chem. Eur. J.*, 2015, **21**, 2165-2172.
20. L. Lu, Q. Hao, W. Lei, X. Xia, P. Liu, D. Sun, X. Wang and X. Yang, *Small*, 2015, **11**, 5833-5843.
21. J. E. Kim, J. Lim, G. Y. Lee, S. H. Choi, U. N. Maiti, W. J. Lee, H. J. Lee and S. O. Kim, *ACS Appl. Mater. Interfaces*, 2016, **8**, 1571-1577.
22. M. Shen, C. Ruan, Y. Chen, C. Jiang, K. Ai and L. Lu, *ACS Appl. Mater. Interfaces*, 2015, **7**, 1207-1218.
23. J. Xu, Q. Yu, C. Wu and L. Guan, *J. Mater. Chem. A*, 2015, **3**, 21647-21654.
24. C. Han, X. Bo, Y. Zhang, M. Li, A. Wang and L. Guo, *Chem. Commun.*, 2015, **51**, 15015-15018.
25. P. Li, R. Ma, Y. Zhou, Y. Chen, Q. Liu, G. Peng and J. Wang, *RSC Adv.*, 2016, **6**, 70763-70769.
26. T. Odedairo, X. Yan, J. Ma, Y. Jiao, X. Yao, A. Du and Z. Zhu, *ACS Appl. Mater. Interfaces*, 2015, **7**, 21373-21380.
